# Supplementary material for: Zinc complexes supported by pyridine-N-oxide ligands: synthesis, structures and catalytic Michael addition reactions
Source: Royal Society of Chemistry journal article supplement (doi:10.1039/d0dt00185f), 2020-01-01
Supplement: d0dt00185f1.pdf [file d0dt00185f1.pdf]

Supporting Information

**Zinc Complexes Supported by Pyridine-N-Oxide Ligands: Synthesis,  
Structure and Catalytic Michael Addition Reaction**

Xiu-Fang Mo,<sup>a</sup> Chang-Feng Xiong,<sup>a</sup> Ze-Wen Chen,<sup>a</sup> Chao Liu,<sup>a</sup> Piao He,<sup>a</sup> Hai-Xia Tong,<sup>b</sup>  
Xiao-Yi Yi\*<sup>a</sup>

<sup>a</sup> Hunan Provincial Key Laboratory of Chemical Power Sources, College of Chemistry and Chemical Engineering, Central South University, Changsha, 410083, P.R. China.

<sup>b</sup> School of Chemistry and Food Engineering, Changsha University of Science and Technology, China 410114, P.R. China.

Fax: 86 731 88879616; Tel: 86 731 88879616; E-mail: xyyi@csu.edu.cn

Figure S1.  $^1\text{H}$  NMR spectra of ligands HL1, HL2 and complexes  $[\text{Zn}(\text{L1})_2]$ ,  $[\text{Zn}(\text{L2})_2]$

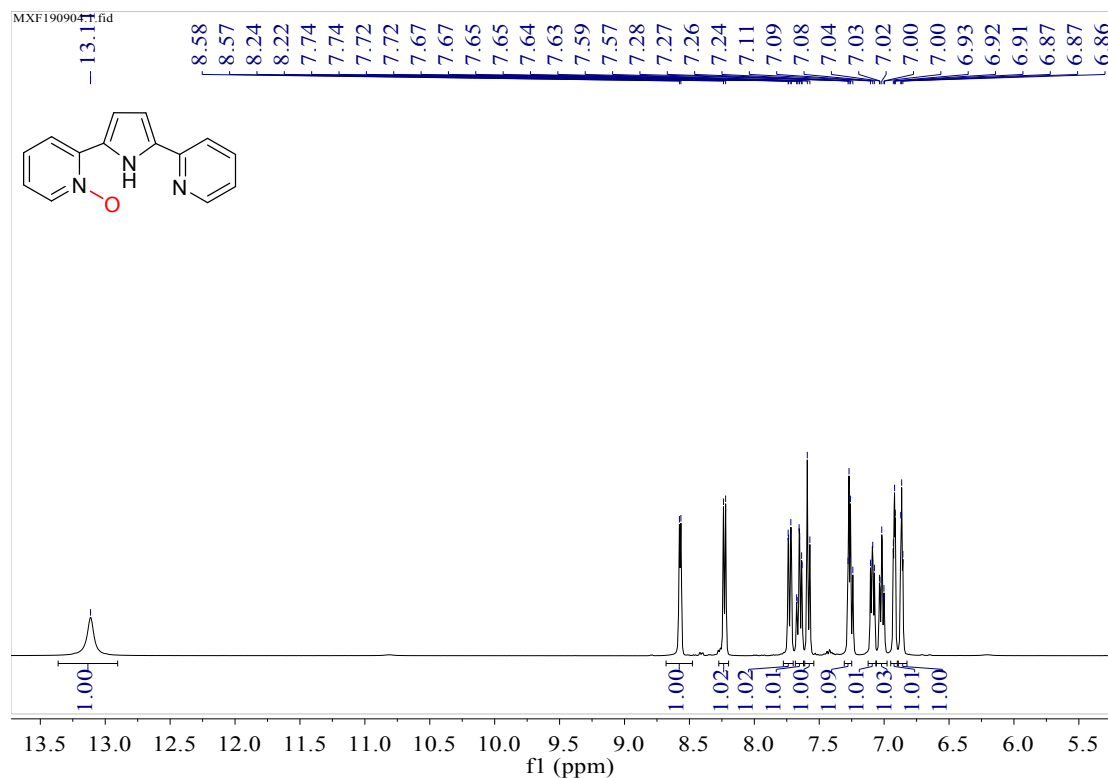

$^1\text{H}$  NMR spectrum of ligand HL1

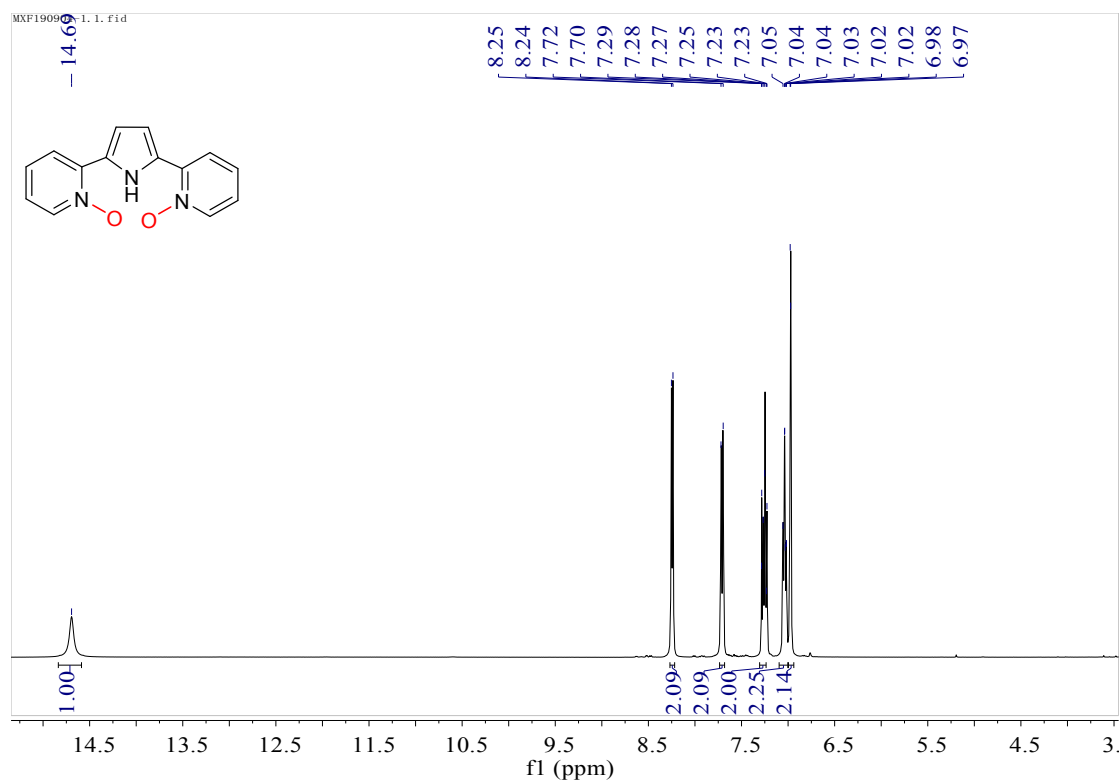

$^1\text{H}$  NMR spectrum of ligand HL2

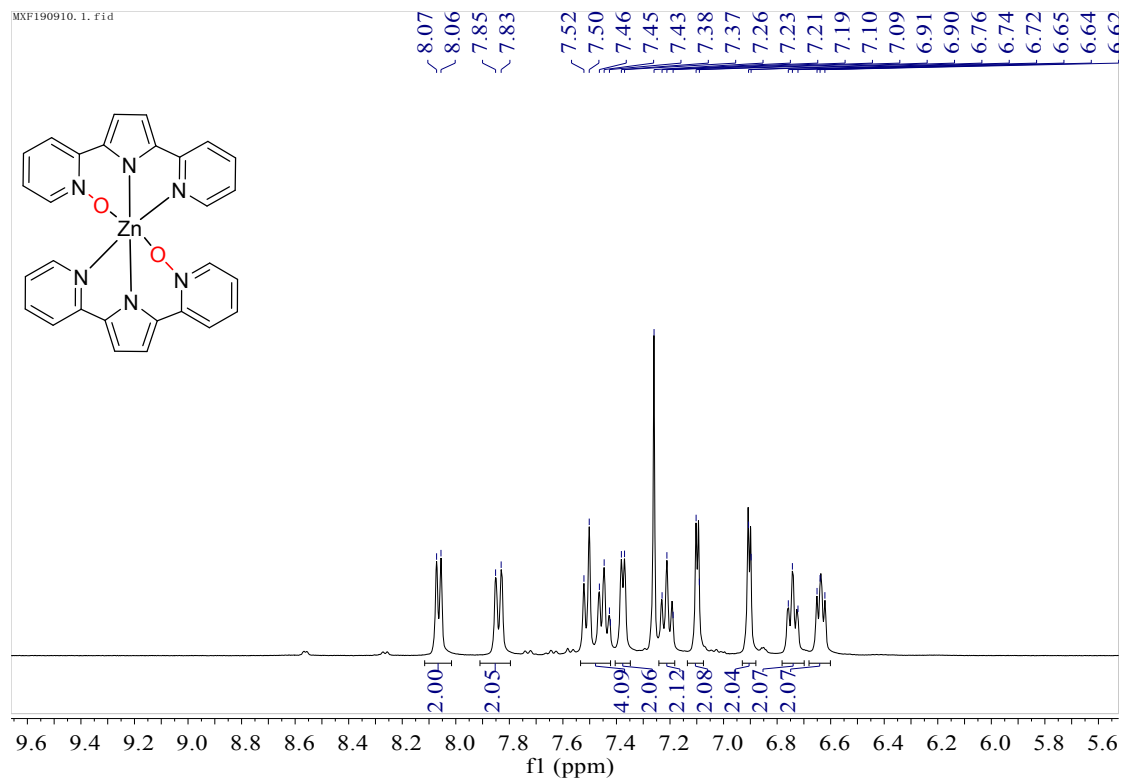

$^1H$  NMR spectrum of Complex  $[Zn(L1)_2]$

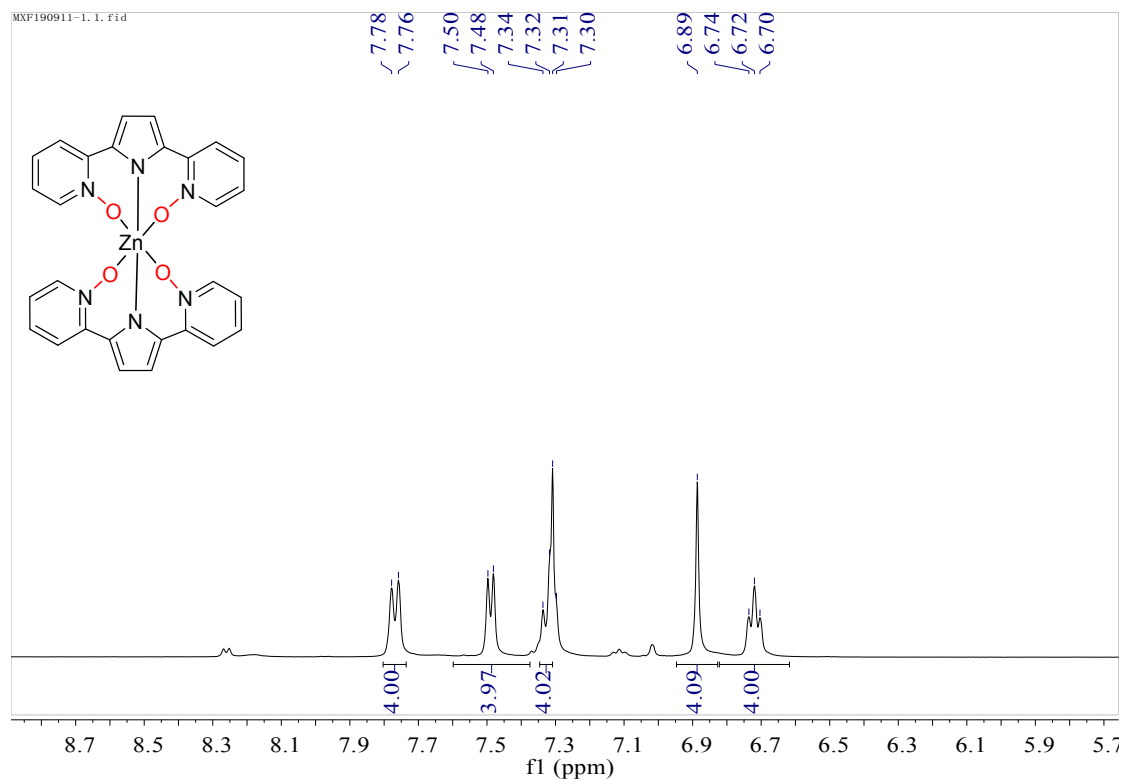

$^1H$  NMR spectrum of Complex  $[Zn(L2)_2]$

Figure S2. The IR spectra of ligands HL1, HL2 and complexes  $[Zn(L1)_2]$ ,  $[Zn(L2)_2]$ .

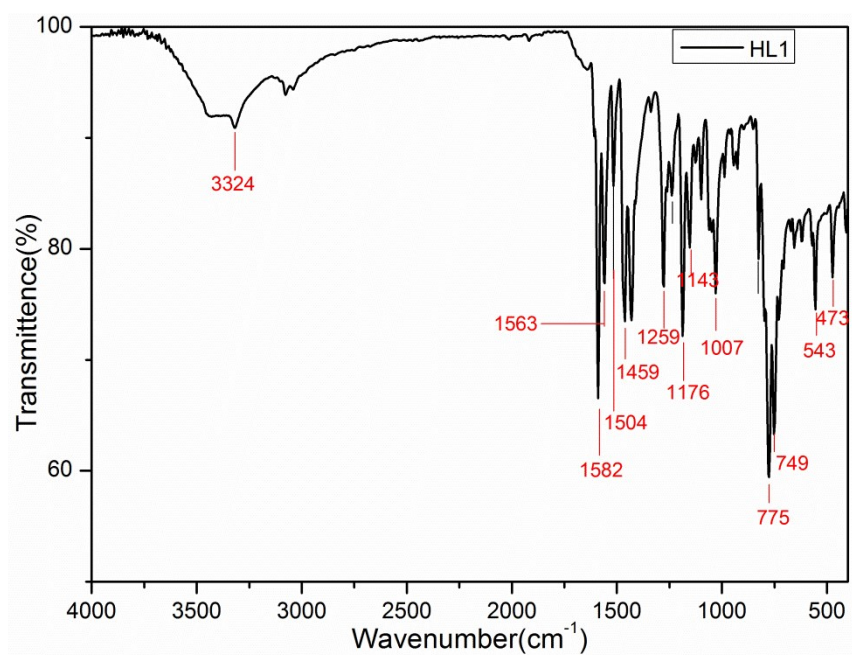

IR spectrum of ligand HL1

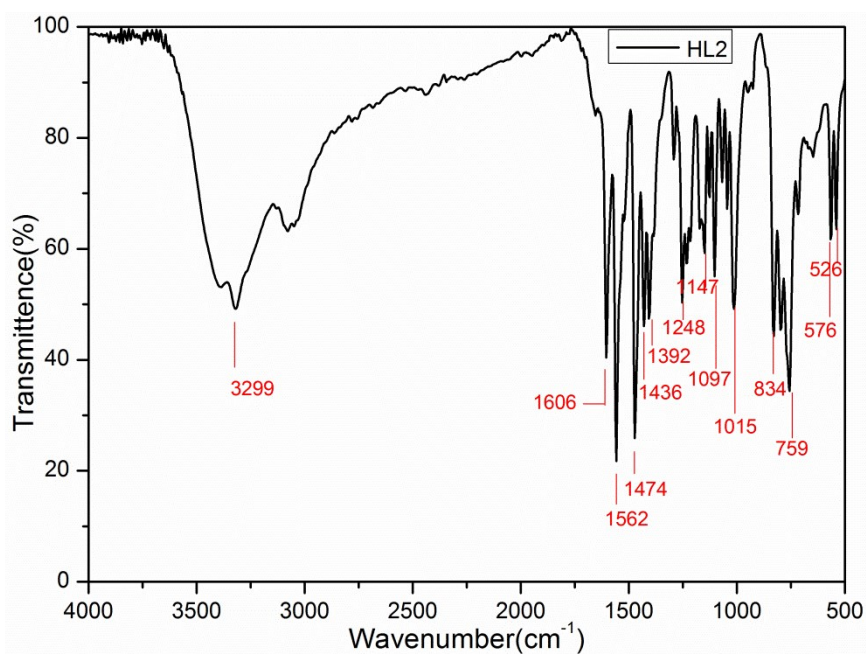

IR spectrum of ligand HL2

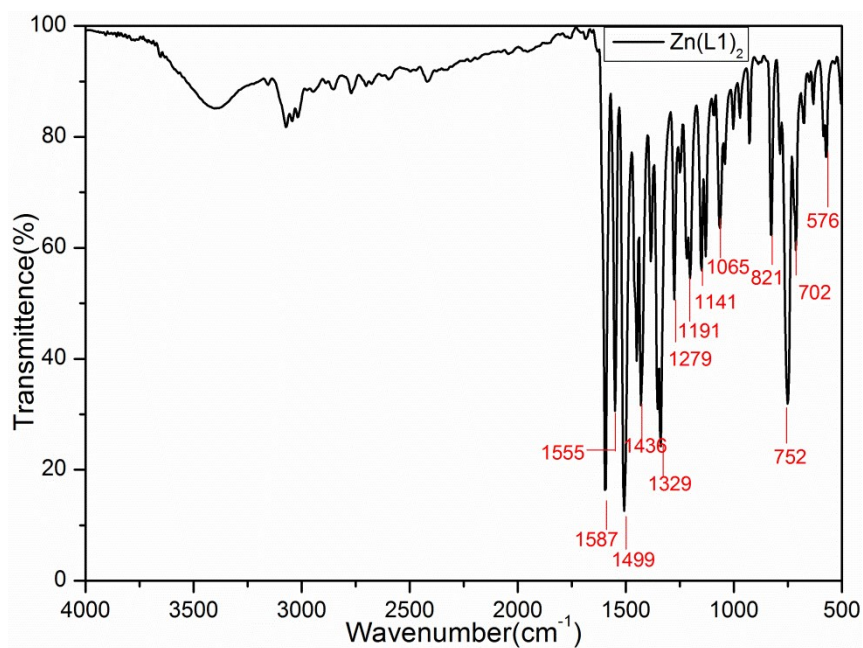

IR spectrum of complex [Zn(L1)<sub>2</sub>]

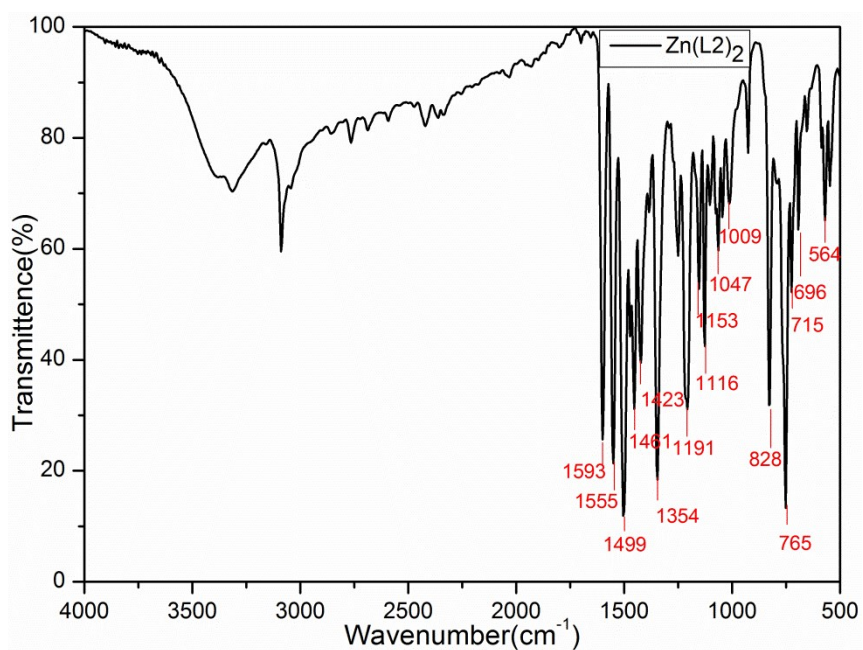

IR spectrum of complex [Zn(L2)<sub>2</sub>]

Figure S3. The ESI-MS spectra of ligands HL1, HL2 and complexes [Zn(L1)<sub>2</sub>], [Zn(L2)<sub>2</sub>].

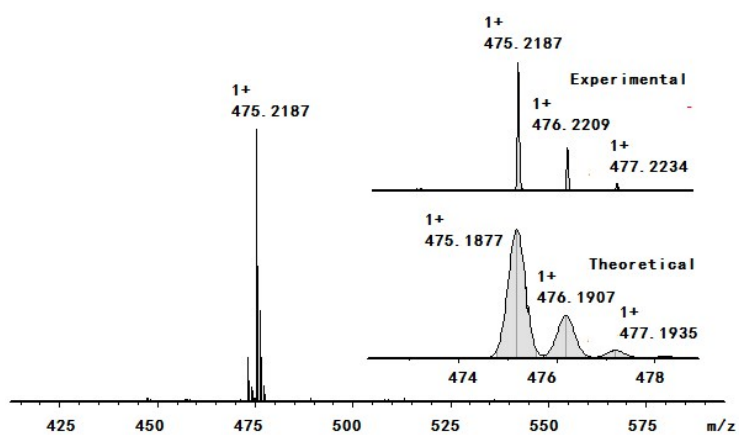

The ESI-MS spectrum of ligand HL1

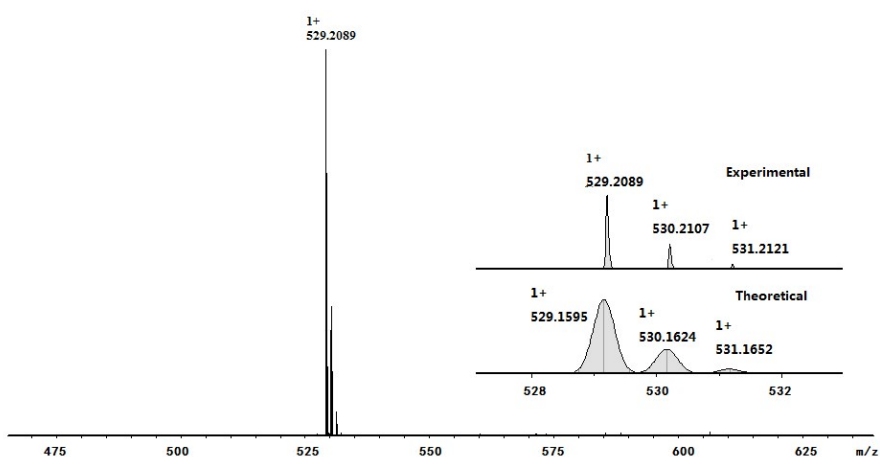

The ESI-MS spectrum of ligand HL2

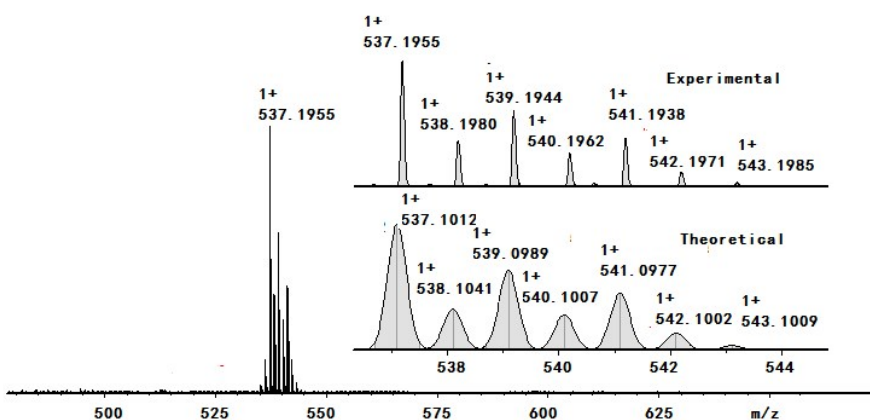

The ESI-MS spectrum of complex [Zn(L1)<sub>2</sub>]

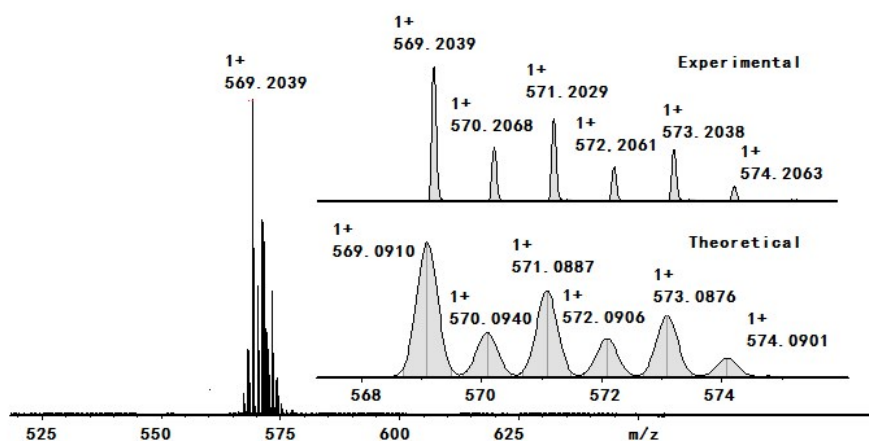

The ESI-MS spectrum of complex  $[Zn(L2)_2]$

Figure S4. The intermolecular-stacking of ligands HL1, HL2 and complexes  $[Zn(L1)_2]$ ,  $[Zn(L2)_2]$ .

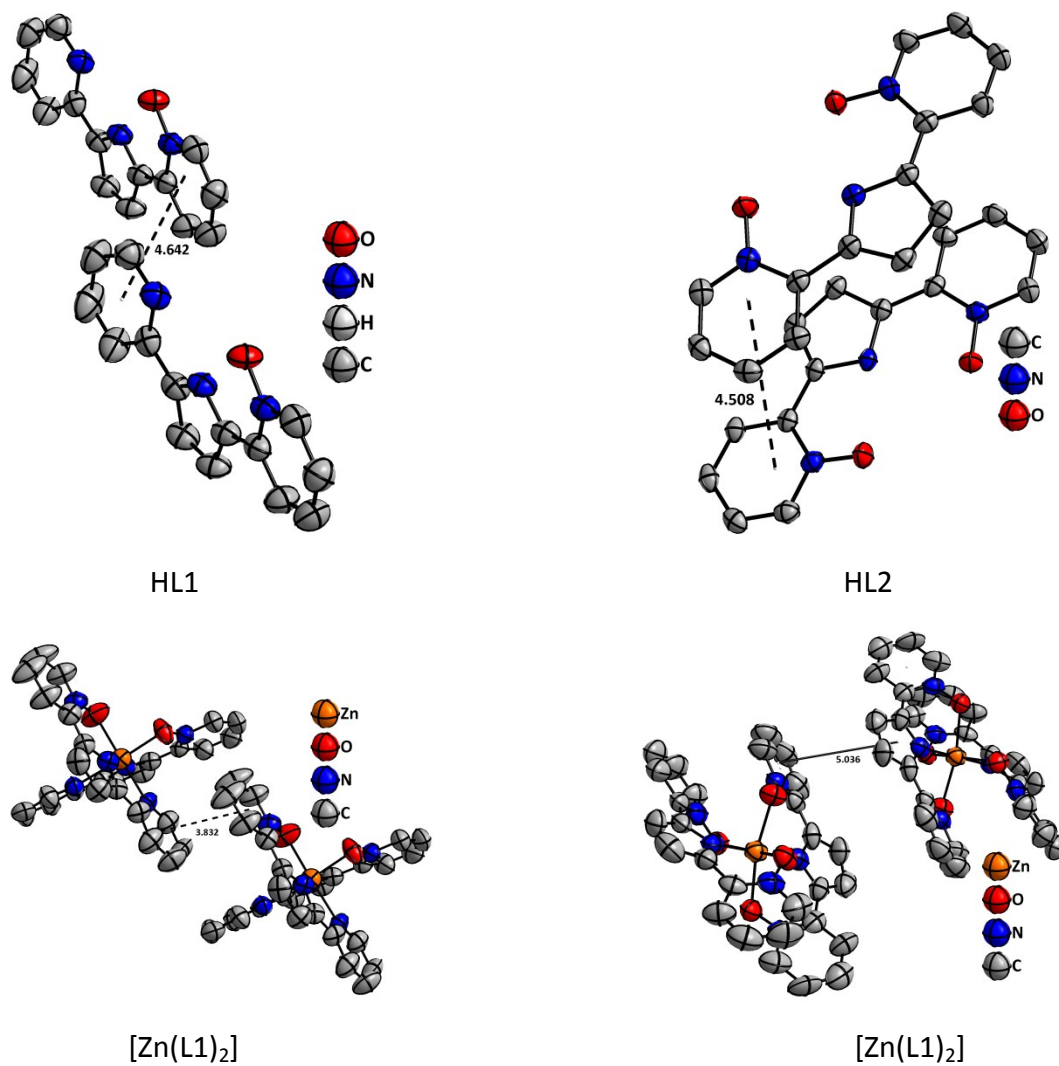

Table S1. X-ray crystallographic data for ligands HL1, HL2 and complexes [Zn(L1)<sub>2</sub>], [Zn(L2)<sub>2</sub>].

| Complex                                                    | HL1                                              | HL2                                                           | Zn(L1) <sub>2</sub>                                                              | Zn(L2) <sub>2</sub>                                                              |
|------------------------------------------------------------|--------------------------------------------------|---------------------------------------------------------------|----------------------------------------------------------------------------------|----------------------------------------------------------------------------------|
| formula                                                    | C <sub>14</sub> H <sub>11</sub> N <sub>3</sub> O | C <sub>14</sub> H <sub>17</sub> N <sub>3</sub> O <sub>5</sub> | C <sub>56.5</sub> H <sub>42</sub> N <sub>12</sub> O <sub>4</sub> Zn <sub>2</sub> | C <sub>32</sub> H <sub>28</sub> Cl <sub>8</sub> N <sub>6</sub> O <sub>4</sub> Zn |
| Formula weight                                             | 237.26                                           | 307.30                                                        | 1119.21                                                                          | 909.57                                                                           |
| Crystal system                                             | orthorhombic                                     | orthorhombic                                                  | monoclinic                                                                       | orthorhombic                                                                     |
| Space group                                                | P2 <sub>1</sub> 2 <sub>1</sub> 2 <sub>1</sub>    | Pbca                                                          | C2/c                                                                             | Fddd                                                                             |
| a, Å                                                       | 10.3807(4)                                       | 16.0485(5)                                                    | 31.091(3)                                                                        | 12.8301(9)                                                                       |
| b, Å                                                       | 10.4296(4)                                       | 8.2154(2)                                                     | 17.2866(16)                                                                      | 16.4771(11)                                                                      |
| c, Å                                                       | 11.1541(4)                                       | 22.2672(6)                                                    | 9.3852(9)                                                                        | 37.538(3)                                                                        |
| α, °                                                       | 90.00                                            | 90.00                                                         | 90.00                                                                            | 90.00                                                                            |
| β, °                                                       | 90.00                                            | 90.00                                                         | 92.426(6)                                                                        | 90.00                                                                            |
| γ, °                                                       | 90.00                                            | 90.00                                                         | 90.00                                                                            | 90.00                                                                            |
| V, Å <sup>3</sup>                                          | 1207.62(8)                                       | 2935.82(14)                                                   | 5039.8(8)                                                                        | 7935.6(10)                                                                       |
| Z                                                          | 4                                                | 8                                                             | 4                                                                                | 8                                                                                |
| ρ <sub>calc</sub> , g cm <sup>-3</sup>                     | 1.305                                            | 1.391                                                         | 1.475                                                                            | 1.523                                                                            |
| T, K                                                       | 296(2)                                           | 296(2)                                                        | 293(2)                                                                           | 293(2)                                                                           |
| μ, mm <sup>-1</sup>                                        | 0.086                                            | 0.107                                                         | 1.067                                                                            | 1.201                                                                            |
| No. of reflections                                         | 16653                                            | 14549                                                         | 18752                                                                            | 14968                                                                            |
| No. of indep.                                              | 2365                                             | 2865                                                          | 4426                                                                             | 1757                                                                             |
| R <sub>int</sub> <sup>fl</sup>                             | 0.0165                                           | 0.0620                                                        | 0.0922                                                                           | 0.1023                                                                           |
| Goodness-of-fit                                            | 1.043                                            | 1.064                                                         | 0.893                                                                            | 1.147                                                                            |
| R <sub>1</sub> <sup>a</sup> , wR <sub>2</sub> <sup>b</sup> | 0.0260,                                          | 0.0793,                                                       | 0.0703, 0.1489                                                                   | 0.0783, 0.1904                                                                   |
| <sup>c</sup> [I > 2σ(I)]                                   | 0.0722                                           | 0.1896                                                        |                                                                                  |                                                                                  |
| R <sub>1</sub> , wR <sub>2</sub> [all data]                | 0.0289, 0.0740                                   | 0.1417, 0.2090                                                | 0.2148, 0.1806                                                                   | 0.1575, 0.2155                                                                   |

$$^a \text{GoF} = [\sum w(|F_o| - |F_c|)^2 / (N_{\text{obs}} - N_{\text{param}})]^{1/2}.$$

$$^b R_1 = \sum ||F_o| - |F_c|| / \sum |F_o|.$$

$$^c wR_2 = [(\sum w|F_o| - |F_c|)^2 / \sum w^2 |F_o|^2]^{1/2}.$$



Table S2. Selected bond distances (Å) and bond angles (°) of ligand HL1 and HL2, complexes [Zn(L1)<sub>2</sub>], [Zn(L2)<sub>2</sub>].

| Ligand HL1 |            |            |            |
|------------|------------|------------|------------|
| N1-O1      | 1.3212(17) | C9-C10     | 1.450(2)   |
| N1-C1      | 1.358(2)   | O1-N1-C1   | 117.96(13) |
| N1-C5      | 1.370(2)   | O1-N1-C5   | 121.29(13) |
| N2-C6      | 1.360(2)   | N1-C5-C4   | 117.25(16) |
| N2-C9      | 1.357(2)   | N1-C5-C6   | 120.46(15) |
| N3-C10     | 1.339(2)   | N1-C1-C2   | 121.50(17) |
| N3-C14     | 1.331(2)   | N2-C6-C5   | 124.72(14) |
| C1-C2      | 1.360(3)   | N2-C6-C7   | 106.50(15) |
| C2-C3      | 1.380(3)   | N2-C9-C8   | 106.57(16) |
| C3-C4      | 1.366(3)   | N2-C9-C10  | 120.55(15) |
| C4-C5      | 1.391(2)   | N3-C10-C9  | 116.31(15) |
| C5-C6      | 1.443(2)   | N3-C10-C11 | 121.61(18) |
| C6-C7      | 1.389(2)   | N3-C14-C13 | 124.1(2)   |
| C7-C8      | 1.387(3)   | C1-C2-C3   | 119.59(18) |

| Ligand HL2 |          |            |          |
|------------|----------|------------|----------|
| N1-O1      | 1.325(3) | C7-C8      | 1.388(5) |
| N1-C1      | 1.354(4) | O1-N1-C1   | 117.8(3) |
| N1-C5      | 1.374(4) | O1-N1-C5   | 121.5(3) |
| N2-O2      | 1.336(3) | O2-N2-C10  | 120.9(3) |
| N2-C10     | 1.369(4) | O2-N2-C14  | 117.6(3) |
| N2-C14     | 1.358(4) | N1-C1-C2   | 121.7(3) |
| N3-C6      | 1.356(4) | N1-C5-C4   | 117.2(3) |
| N3-C9      | 1.359(4) | N2-C10-C9  | 121.3(3) |
| C1-C2      | 1.357(5) | N2-C10-C11 | 117.3(4) |
| C2-C3      | 1.383(5) | N3-C6-C5   | 124.2(4) |
| C3-C4      | 1.361(5) | N3-C9-C8   | 107.6(3) |
| C4-C5      | 1.386(4) | N3-C9-C10  | 127.7(3) |
| C5-C6      | 1.443(5) | C1-C2-C3   | 119.1(3) |
| C6-C7      | 1.391(5) | C6-N3-C9   | 110.0(3) |

| Complex [Zn(L1) <sub>2</sub> ] |           |             |            |
|--------------------------------|-----------|-------------|------------|
| Zn1-O1                         | 2.122(5)  | O1-Zn1-O2   | 87.2(2)    |
| Zn1-O2                         | 2.116(5)  | O1-Zn1-N1   | 83.1(2)    |
| Zn1-N2                         | 1.985(5)  | O1-Zn1-N3   | 159.2(2)   |
| Zn1-N3                         | 2.248(5)  | O1-Zn1-N4   | 90.6(2)    |
| Zn1-N4                         | 2.376(6)  | O2-Zn1-N2   | 109.66(19) |
| Zn1-N5                         | 1.955(5)  | O2-Zn1-N3   | 93.7(2)    |
| O1-N1                          | 1.295(6)  | O2-Zn1-N5   | 85.7(2)    |
| O2-N6                          | 1.303(6)  | Zn1-O1-N1   | 132.7(4)   |
| N1-C5                          | 1.347(8)  | Zn1-O2-N6   | 127.0(4)   |
| N1-C29                         | 1.369(8)  | Zn1-N1-C1   | 130.4(5)   |
| N2-C6                          | 1.351(7)  | O1-N1-C5    | 123.5(6)   |
| N2-C9                          | 1.352(7)  | Zn1-N2-C6   | 131.3(5)   |
| N3-C10                         | 1.345(8)  | Zn1-N2-C9   | 118.5(5)   |
| N3-C14                         | 1.335(8)  | Zn1-N4-C15  | 131.6(5)   |
| N4-C15                         | 1.334(8)  | Zn1-N4-C19  | 109.3(5)   |
| N4-C19                         | 1.350(7)  | Zn1-N5-C23  | 130.4(5)   |
| N5-C20                         | 1.355(8)  | N1-C29-C2   | 121.7(8)   |
| N5-C23                         | 1.357(7)  | N2-C6-C5    | 124.6(7)   |
| N6-C24                         | 1.365(8)  | N2-C6-C7    | 108.3(6)   |
| N6-C28                         | 1.357(7)  | N2-C9-C10   | 117.4(7)   |
| C5-C6                          | 1.442(9)  | N3-C10-C11  | 121.1(7)   |
| C9-C10                         | 1.461(9)  | N5-C20-C19  | 118.1(7)   |
| C19-C20                        | 1.431(9)  | N5-C23-C24  | 123.8(7)   |
| C23-C24                        | 1.431(9)  | N6-C24-C25  | 115.8(7)   |
| Complex [Zn(L2) <sub>2</sub> ] |           |             |            |
| Zn1-O1                         | 2.168(5)  | O1-Zn1-O1A  | 90.3(3)    |
| Zn1-O1A                        | 2.168(5)  | O1-Zn1-O2   | 165.38(18) |
| Zn1-O2                         | 2.154(5)  | O1-Zn1-O2A  | 91.4(2)    |
| Zn1-O2A                        | 2.154(5)  | O1-Zn1-N2   | 82.9(2)    |
| Zn1-N2                         | 1.959(6)  | O1-Zn1-N2A  | 97.3(2)    |
| Zn1-N2A                        | 1.959(6)  | O2-Zn1-N2   | 82.5(2)    |
| O1-N1                          | 1,328(7)  | O2-Zn1-N2A  | 97.3(2)    |
| O2-N3                          | 1.319(7)  | O1A-Zn1-O2  | 91.4(2)    |
| N1-C1                          | 1.373(10) | O1A-Zn1-N2  | 97.3(2)    |
| N1-C5                          | 1.367(9)  | O2A-Zn1-N2  | 97.3(2)    |
| N2-C6                          | 1.362(9)  | O2A-Zn1-N2A | 97.3(2)    |
| N2-C9                          | 1.357(9)  | Zn1-O1-N1   | 117.3(4)   |
| N3-C10                         | 1.346(9)  | Zn1-O2-N3   | 117.1(4)   |
| N3-C14                         | 1.357(10) | Zn1-N2-C6   | 127.4(5)   |

Symmetric code:  ${}^1X, 7/4-Y, 3/4-Z; {}^23/4-X, 7/4-Y, +Z; {}^33/4-X, +Y, 3/4-Z$

Figure S5. <sup>1</sup>H NMR spectra of isolated addition products.

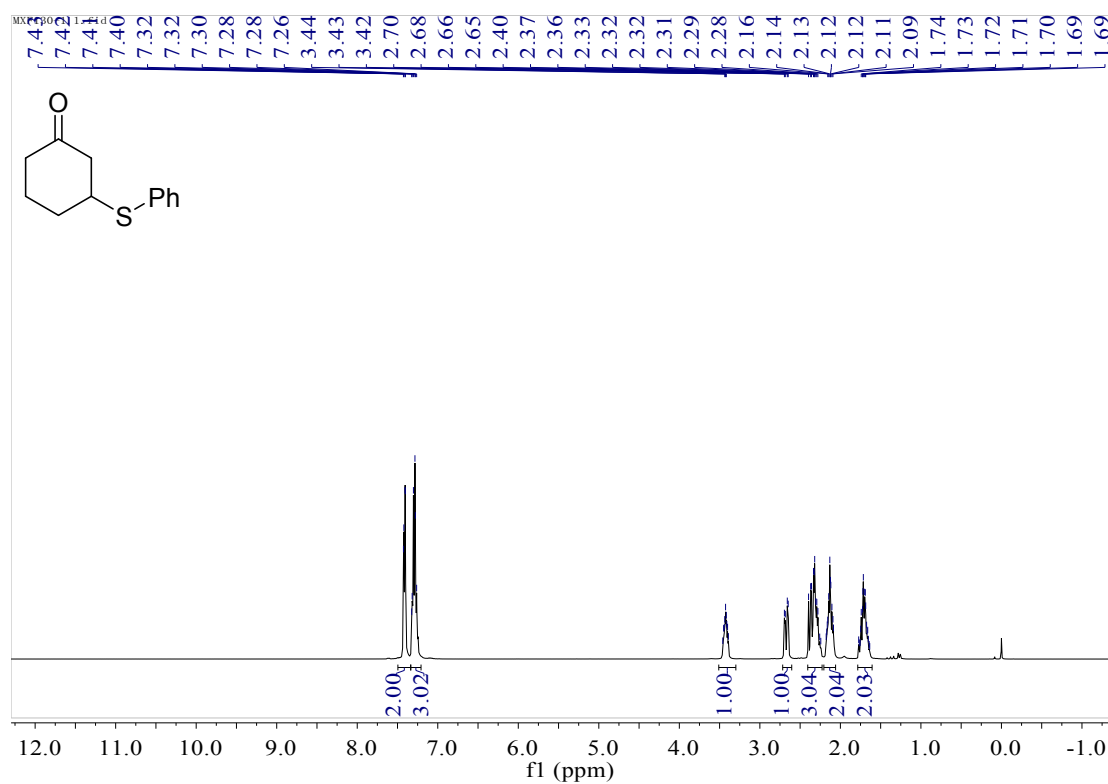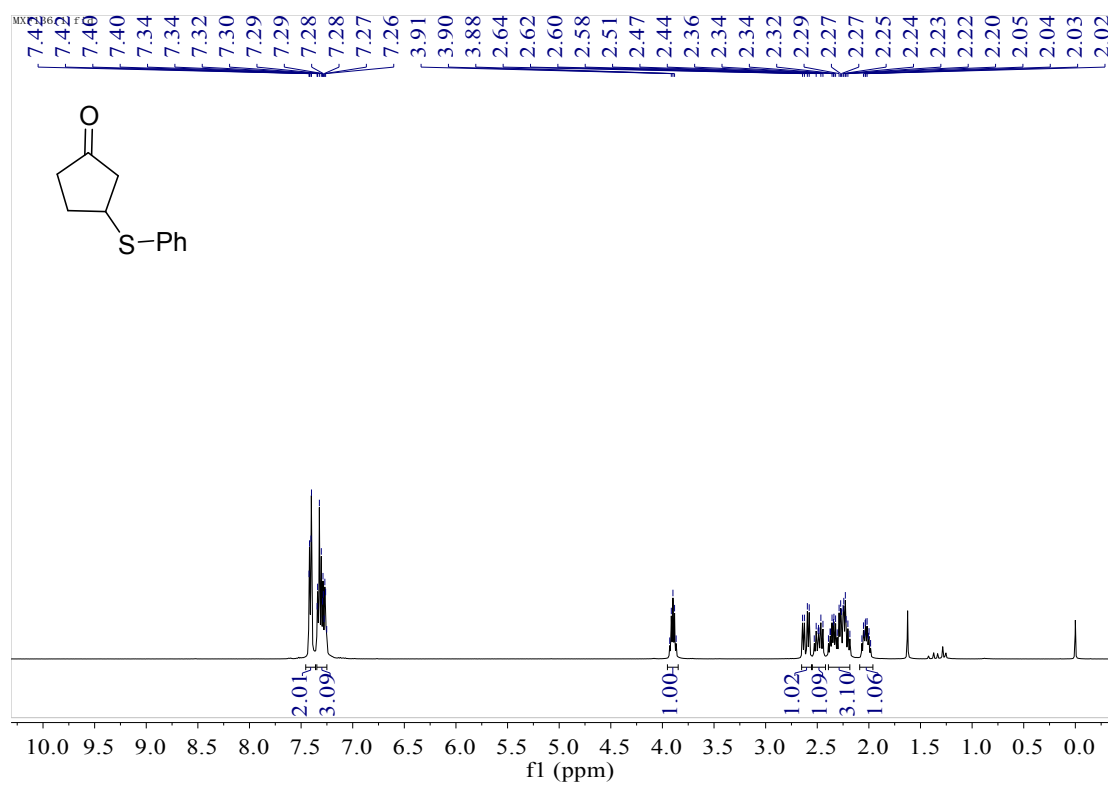

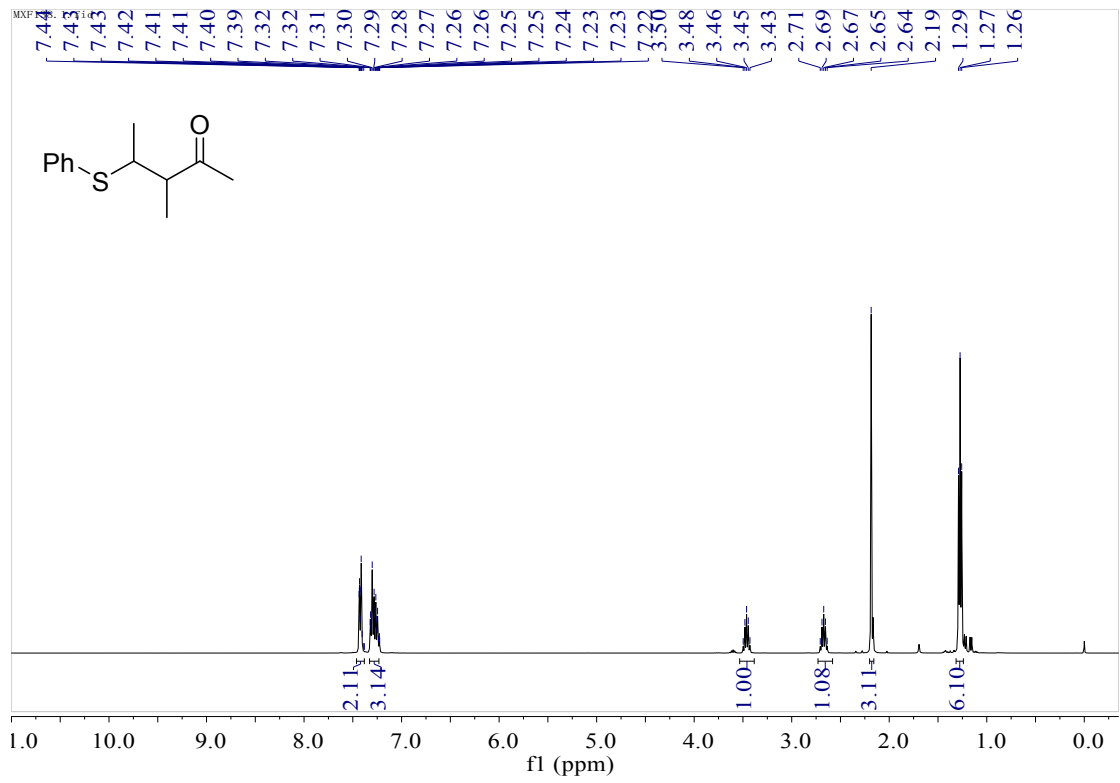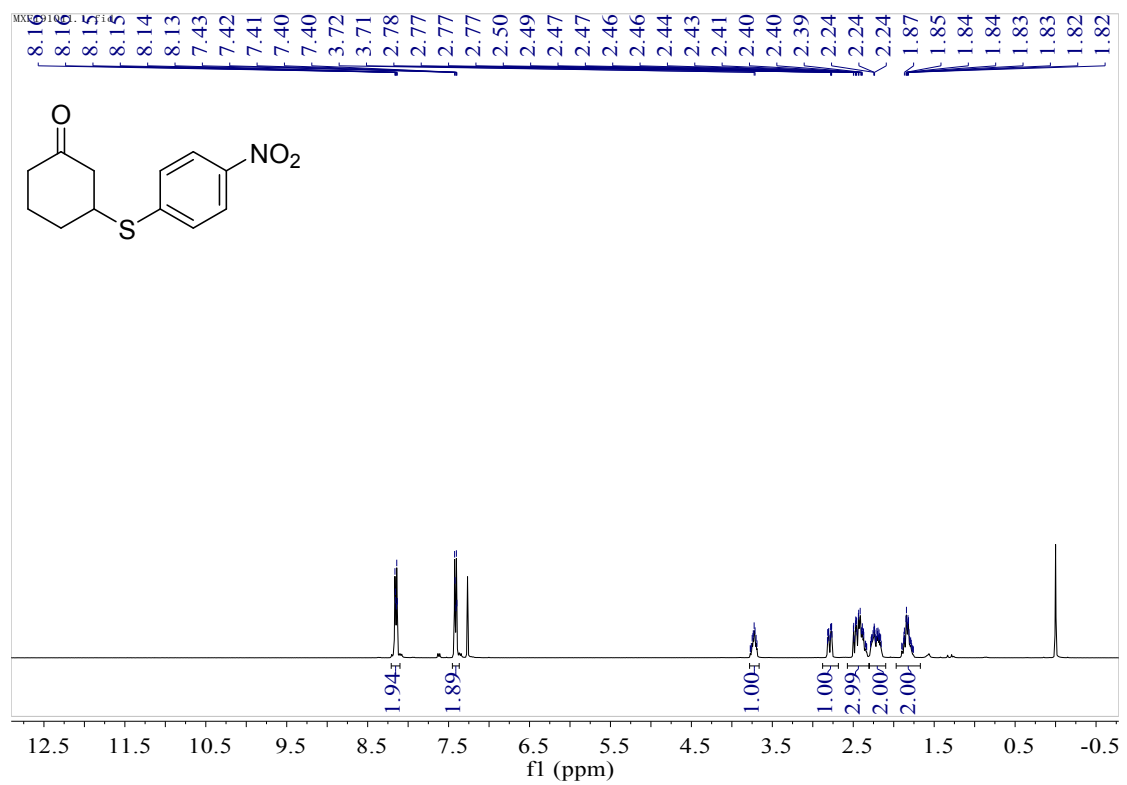

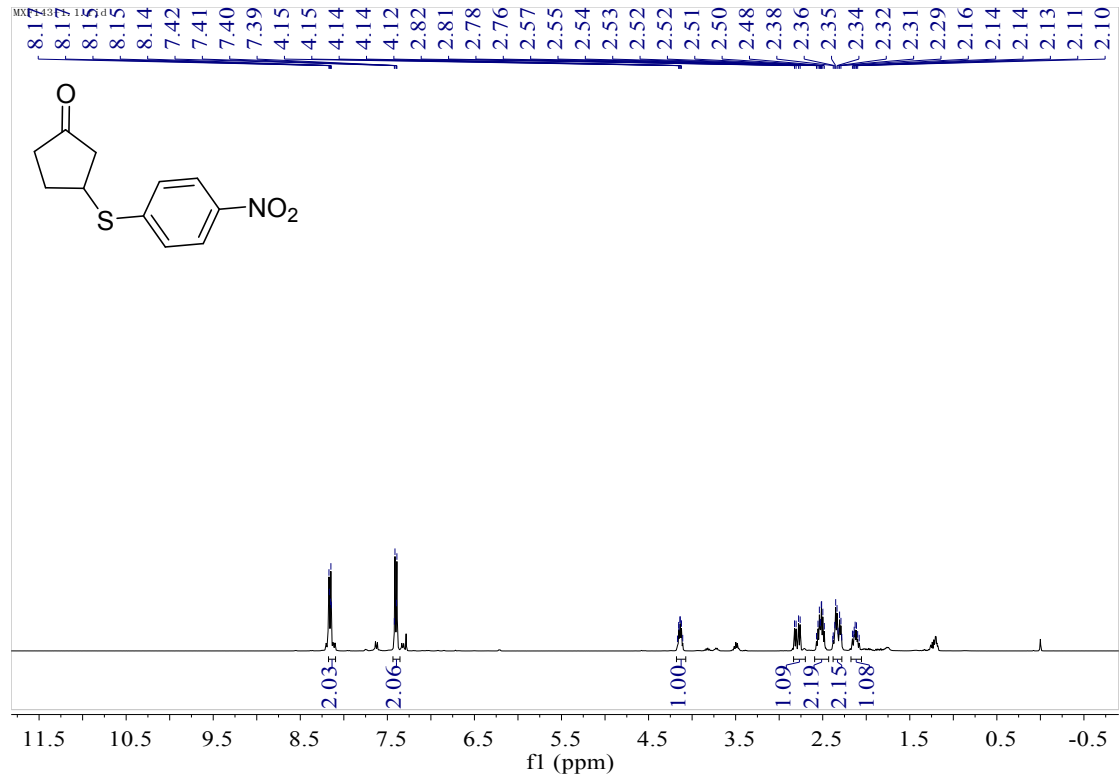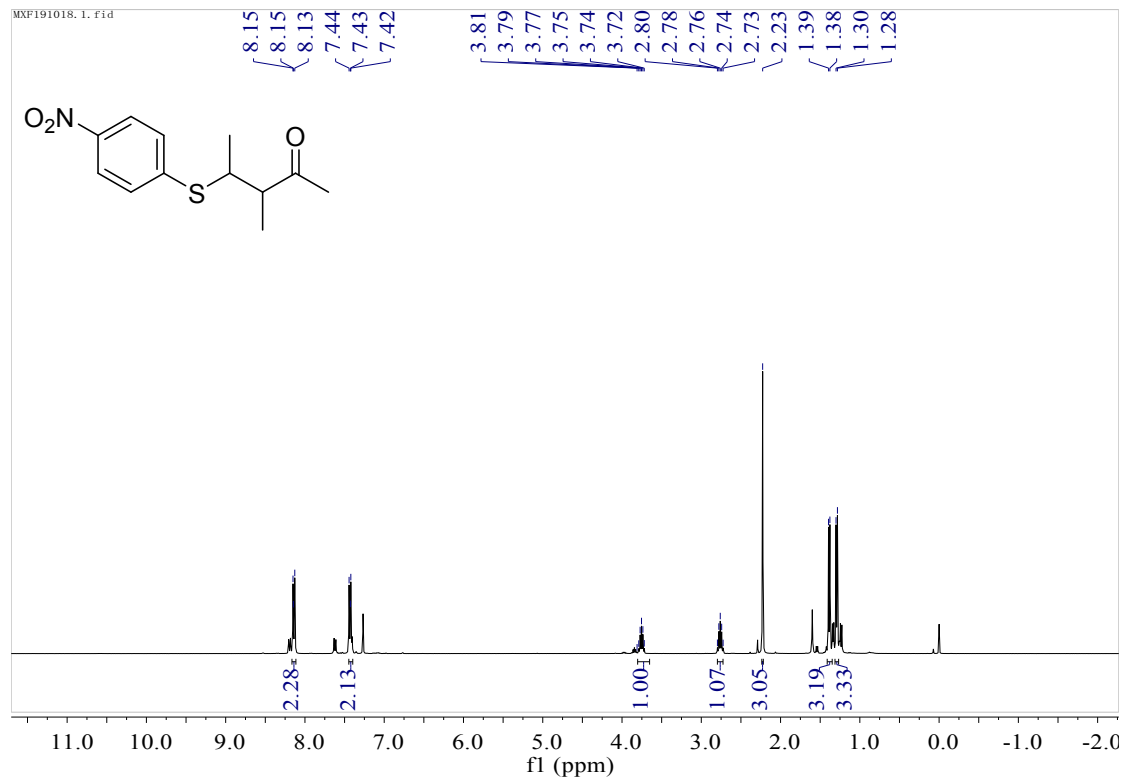

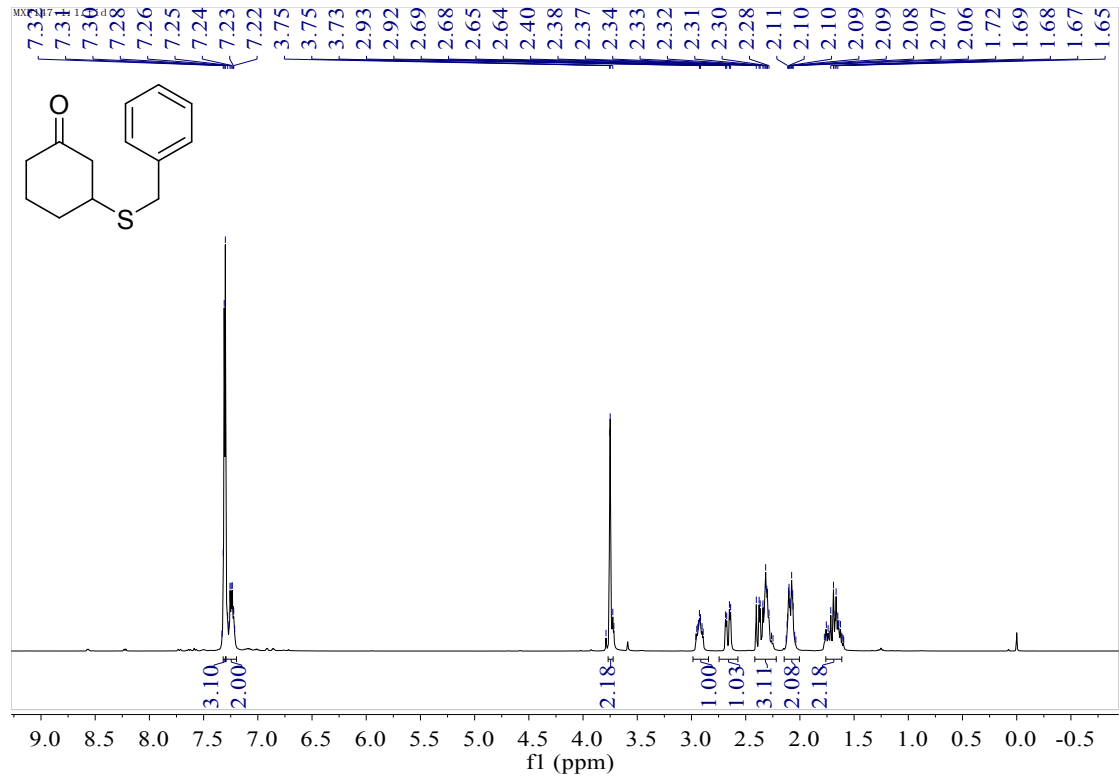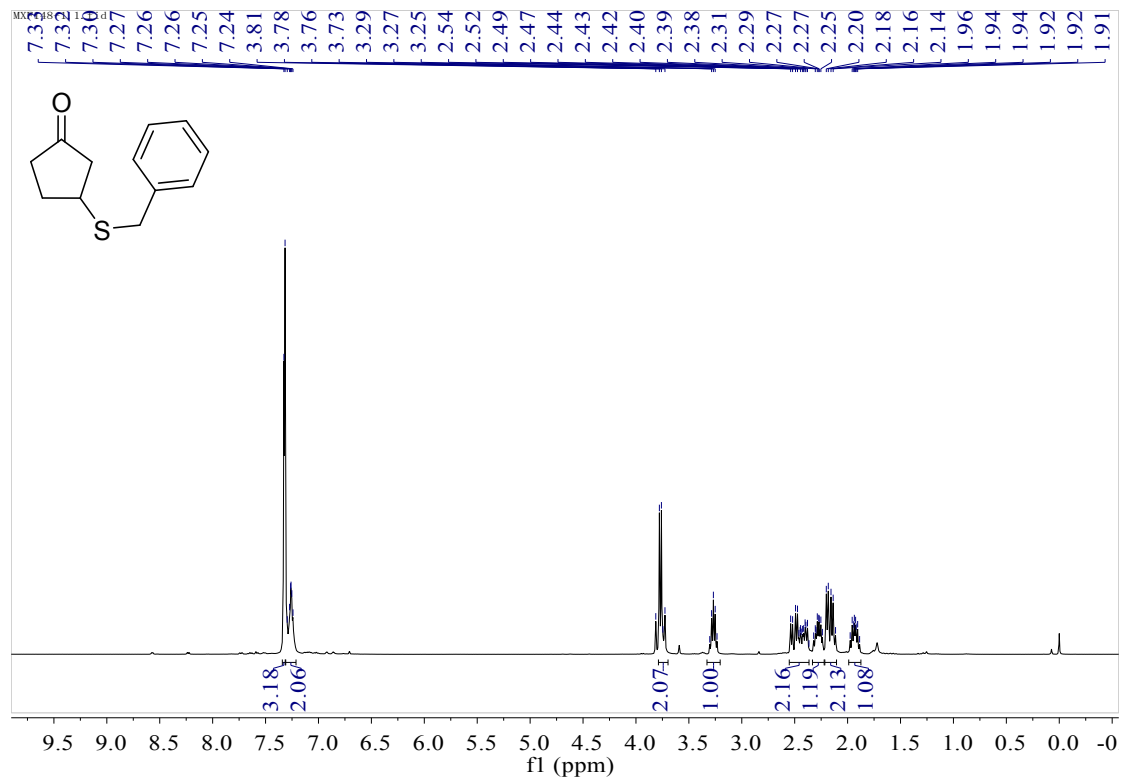

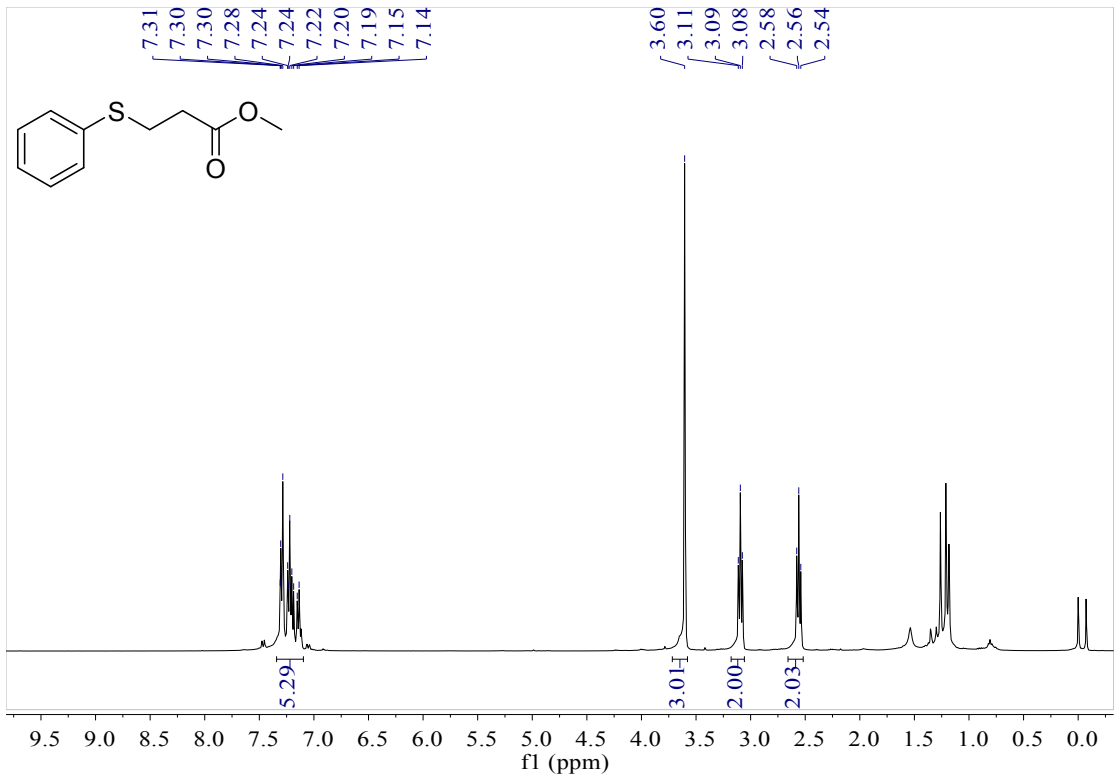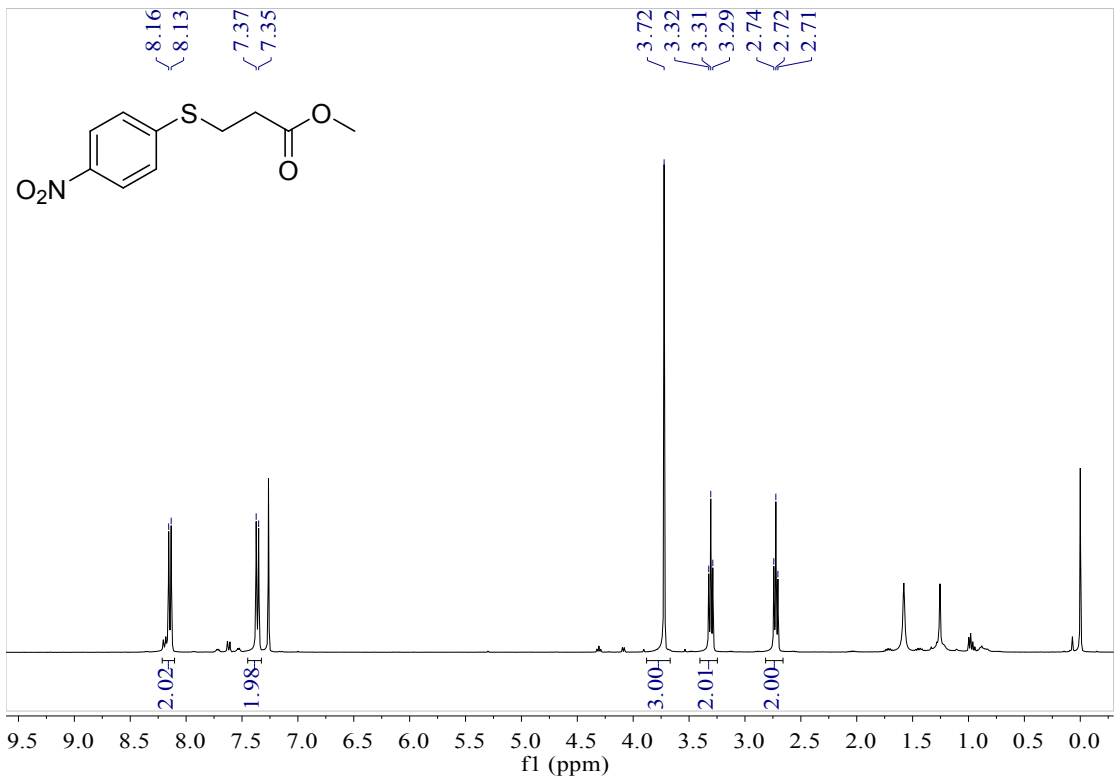



The corresponding NMR data of isolated addition products.

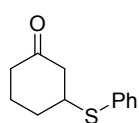

3-(Phenylsulfanyl)cyclohexanone  $^1\text{H}$  NMR (400 MHz,  $\text{CDCl}_3$ )  $\delta$  7.43-7.40 (m, 2H), 7.32-7.26 (m, 3H), 3.46-3.39 (m, 1H), 2.67 (dd,  $J = 12.0$  Hz, 4.0 Hz, 1H), 2.40-2.24 (m, 3H), 2.18-2.09 (m, 2H), 1.77-1.64 (m, 2H).

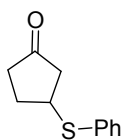

4-(Phenylsulfanyl)cyclopentanone  $^1\text{H}$  NMR (400 MHz,  $\text{CDCl}_3$ )  $\delta$  7.42-7.40 (m, 2H), 7.34-7.25 (m, 3H), 3.93-3.87 (m, 1H), 2.61 (dd,  $J = 16.0$  Hz, 8.0 Hz, 1H), 2.53-2.44 (m, 1H), 2.38-2.18 (m, 3H), 2.07-1.98 (m, 1H).

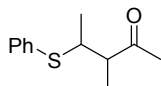

3-methyl-4-(phenylthio)-2-pentanone  $^1\text{H}$  NMR (400 MHz,  $\text{CDCl}_3$ )  $\delta$  7.44-7.38 (m, 2H), 7.32-7.22 (m, 3H), 3.50-3.43 (m, 1H), 2.71-2.64 (m, 1H), 2.19 (s, 3H), 1.27 (t,  $J = 8.0$  Hz, 6H).

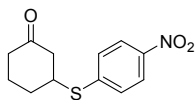

3-[(4-nitrophenyl)thio]-cyclohexanone  $^1\text{H}$  NMR (400 MHz,  $\text{CDCl}_3$ )  $\delta$  8.16-8.13 (m, 2H), 7.43-7.40 (m, 2H), 3.77-3.69 (m, 1H), 2.82-2.76 (m, 1H), 2.50-2.33 (m, 3H), 2.29-2.15 (m, 2H), 1.90-1.76 (m, 2H).

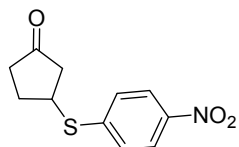

3-[(4-nitrophenyl)thio]-cyclopentanone  $^1\text{H}$  NMR (400 MHz,  $\text{CDCl}_3$ )  $\delta$  8.17-8.14 (m, 2H), 7.42-7.39 (m, 2H), 4.17-4.11 (m, 1H), 2.80 (dd,  $J = 12.0$  Hz, 4.0 Hz, 1H), 2.57-2.48 (m, 2H), 2.38-2.28 (m, 2H), 2.16-2.08 (m, 1H).

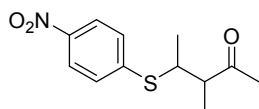

3-methyl-4-(4-nitrophenylthio)-2-pentanone  $^1\text{H}$  NMR (400 MHz,  $\text{CDCl}_3$ )  $\delta$  8.15-8.13 (m, 2H), 7.44-7.42 (m, 3H), 3.81-3.72 (m, 1H), 2.80-2.73 (m, 1H), 2.23 (s, 3H), 1.38 (d,  $J = 4.0$  Hz, 3H), 1.29 (d,  $J = 8.0$  Hz, 3H).

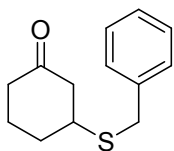

3-[(phenylmethyl)thio]-cyclohexanone  $^1\text{H}$  NMR (400 MHz,  $\text{CDCl}_3$ )  
 $\delta$  7.33-7.30 (m, 3H), 7.28-7.21 (m, 2H), 3.79-3.72 (m, 2H), 2.96-2.89  
( m, 1H), 2.69-2.64 (m, 1H), 2.67 (dd,  $J = 12.0$  Hz, 4.0 Hz, 1H), 2.40-  
2.25 (m, 3H), 2.13-2.04 (m, 2H), 1.77-1.60 (m, 2H).

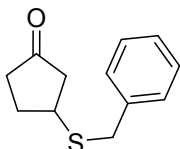

3-[(phenylmethyl)thio]-Cyclopentanone  $^1\text{H}$  NMR (400 MHz,  $\text{CDCl}_3$ )  
 $\delta$  7.33-7.30 (m, 3H), 7.27-7.24 (m, 2H), 3.81-3.73 (m, 2H), 3.30-  
3.23 (m, 1H), 2.54-2.37 (m, 2H), 2.32-2.24 (m, 1H), 2.20-2.11 (m,  
2H), 1.98-1.89 (m, 1H).

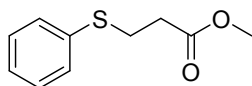

Methyl-3-(phenylthio) propanoate  $^1\text{H}$  NMR (400 MHz,  $\text{CDCl}_3$ )  $\delta$   
7.31-7.14 (m, 5H), 3.6 (s, 3H), 3.09 (t,  $J = 4.0$  Hz, 2H), 2.56 (t,  $J =$   
8.0 Hz, 2H)

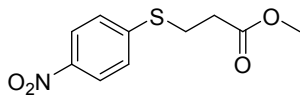

Propanoic-3-(*p*-nitrophenyl thio) methyl ester  $^1\text{H}$  NMR (400  
MHz,  $\text{CDCl}_3$ )  $\delta$  8.14 (d,  $J = 12.0$  Hz, 2H), 7.36 (d,  $J = 8.0$  Hz, 2H),  
3.72 (s, 3H), 3.31 (t,  $J = 4.0$  Hz, 2H), 2.72 (t,  $J = 4.0$  Hz, 2H).
